# Supplementary material
Source: PubMed Central journal article supplement (PMC6385350)

## Appendix

### An Adiponectin Receptor Agonist Reduces Type 2 Diabetic Periodontitis

**Appendix Table. Primer sequences used in qRT-PCR experiments.**

| <b><i>Gene</i></b>       | <b><i>Forward primer (5'-3')</i></b> | <b><i>Reverse primer (5'-3')</i></b> |
|--------------------------|--------------------------------------|--------------------------------------|
| <b>GAPDH</b>             | AGGTCGGTGTGAACGGATTTG                | TGTAGACCATGTAGTTGAGGTCA              |
| <b>ALP</b>               | GCCTTTGAGGTTTTTGGTCA                 | AACCCAGACACAAGCATTCC                 |
| <b>RUNX2</b>             | CAGTCACCTCAGGCATGTCC                 | GTGCTGCTGGTCTGGAAGG                  |
| <b>Collagen I, alpha</b> | TGACTGGAAGAGCGGAGAGT                 | GTTCCGGGCTGATGTACCAG                 |
| <b>OCN</b>               | GCCGGAGTCTGTTCACTACC                 | GCGCTCTGTCTCTCTGACCT                 |
| <b>Cathepsin K</b>       | GAAGAAGACTCACCAGAAGCAG               | TCCAGGTTATGGGCAGAGATT                |
| <b>TRAP</b>              | GGGAAATGGCCAATGCCAAAGAGA             | TCGCACAGAGGGATCCATGAAGTT             |
| <b>CCL2</b>              | TTAAAAACCTGGATCGGAACCAA              | GCATTAGCTTCAGATTTACGGGT              |
| <b>MMP9</b>              | GCAGAGGCATACTTGTACCG                 | TGATGTTATGATGGTCCCCTTG               |
| <b>NFATc1</b>            | GGAGAGTCCGAGAATCGAGAT                | TTGCAGCTAGGAAGTACGTCT                |
| <b>ADIPOR1</b>           | ACGTTGGAGAGTCATCCCTGAT               | CTCTGTGTGGATGCGGAAGAT                |
| <b>IL-6</b>              | TCCAGTTGCCTTGGGAC                    | AGTCTCCTCTCCGGACTTGT                 |
| <b>SDF-1</b>             | CTGCATCAGTGACGGTAAACC                | CAGCCGTGCAACAATCTGAA                 |

**Appendix Figure 1. The weight of DIO mice during 2-week periodontitis model with or without APR treatment.** The red dots represent weights of vehicle-treated group and blue dots represent APR-treated group on days 1, 4, 7, 10, and 14. Data are shown as mean±SD (n=7-9). Differences between both groups were not significant ( $p>0.05$ ).

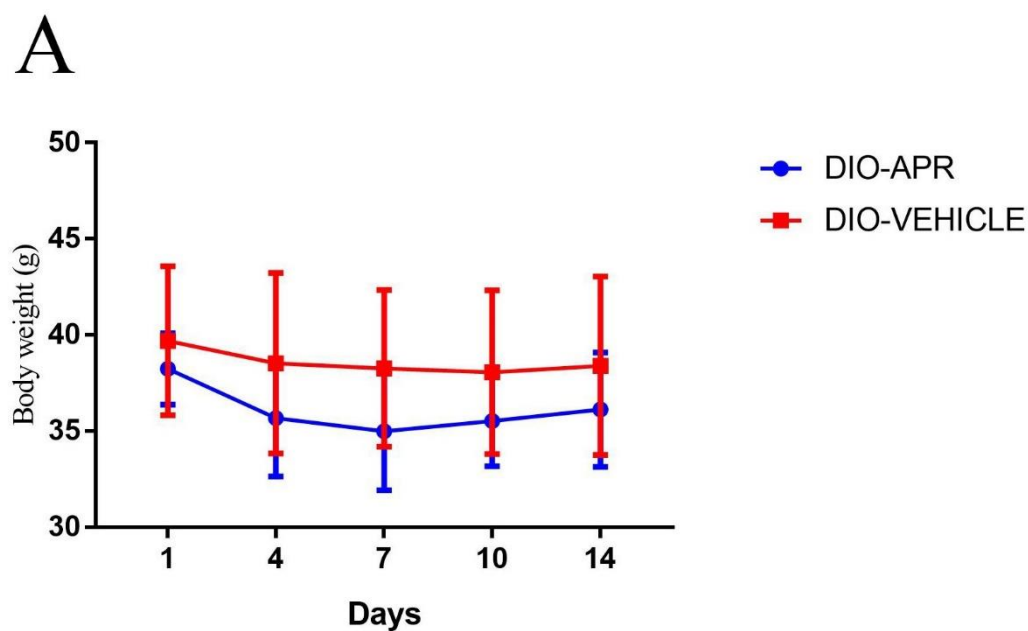

**Appendix Figure 2. Evaluation of the alveolar bone loss in the 4-week periodontitis model.**

When the alveolar bone loss baseline of DIO and APN KO groups were compared with that of the NC group, differences between groups were not significant. Data are shown as mean±SD (n=5).

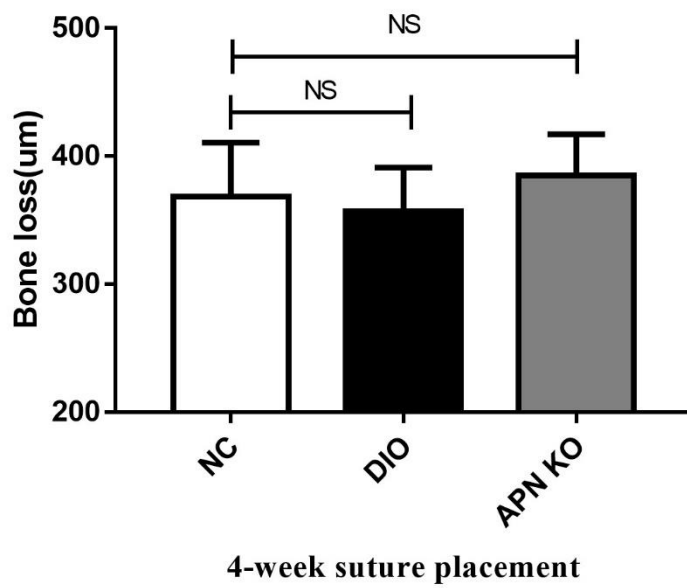

**Appendix Figure 3. Measurement of CXCR4 mRNA levels in bone marrow tissue.** RT-PCR of CXCR4 was conducted with bone marrow tissue from NC, DIO, and APN KO groups which were treated with vehicle or APR. Values between vehicle- and APR- treatment groups in NC, DIO, and APN KO mice were not significantly different (NS,  $p > 0.05$ ). Data are shown as mean  $\pm$  SD (n=4-6).

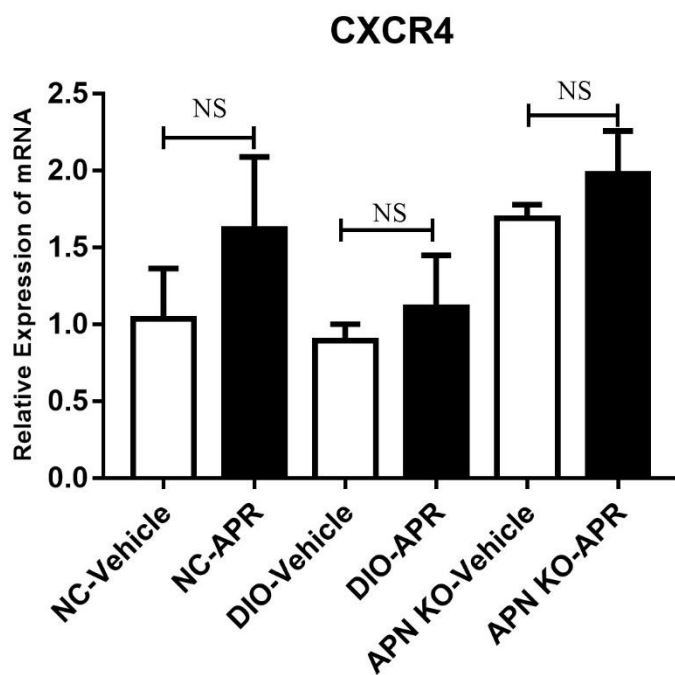

**Appendix Figure 4. Western blot of the cytosol and nuclear fractions of Fig.1F.** Nuclear and cytosolic extracts were prepared from BMMs treated with RANKL and M-CSF with or without APR. The cytosol and nuclear fractions were Immunoblotted with Lamin b1 antibody.

Figure S4

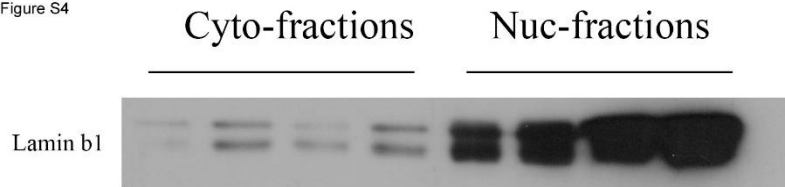

Supplement: DS_10.1177_0022034518818449.pdf [file DS_10.1177_0022034518818449.pdf]
